# Supplementary material
Source: publisher site journal article supplement (https://www.dovepress.com/article/290327)
Supplement: Supplementary file 1 [file get_supplementary_file.php]

Table S1. Feature selection methods and classifiers used for discrimination modeling.

| **Feature selection methods***1  **(*n*=22)** | CIFE[1], CMIM[1],DISR[1], ICAP[2], JMI[1], MIFS[1], MIM[1], MRMR[1], Fisher_score[3], Lap_score[3], ReliefF[4, 5], SPEC[6], Trace_ratio[7], II_I21[8], Is_I21[8], MCFS[9], NDFS[10], RFS[11], UDFS[12], F_score[2], Gini_index[2], T_score[2] |
| --- | --- |
| **Classifiers***2  **(*n*=8)** | Logistic regression, SVM, Naïve Bayes, KNN, Decision tree, Bagging, Random forest, AdaBoosting |
| *1. Implemented with an open source machine learning toolkit- scikit-feature [2]  *2. Implemented with an open source machine learning toolkit- scikit-learn [13] | |

**References:**

1. Brown G, Pocock A, Zhao MJ, Lujan M: Conditional Likelihood Maximisation: A Unifying Framework for Information Theoretic Feature Selection. J MACH LEARN RES 13:27-66, 2012

2. Li J, et al.: Feature Selection: A Data Perspective. ACM COMPUT SURV 50:1-45, 2017

3. He X, Cai D, Niyogi P: Laplacian score for feature selection. Proc. Proceedings of the 18th International Conference on Neural Information Processing Systems: Vancouver, British Columbia, Canada2005

4. Robnik-Šikonja M, Kononenko I: Theoretical and Empirical Analysis of ReliefF and RReliefF. MACH LEARN 53:23-69, 2003

5. Zheng Z, Lei W, Liu H, Ye J: On Similarity Preserving Feature Selection. IEEE Transactions on Knowledge & Data Engineering 25:619-632, 2013

6. Zheng Z, Liu H: Spectral feature selection for supervised and unsupervised learning. Proc. Machine Learning, Twenty-fourth International Conference2007

7. Nie F, Xiang S, Jia Y, Zhang C, Yan S: Trace Ratio Criterion for Feature Selection. Proc. National Conference on Artificial Intelligence2008

8. Liu J, Ji S, Ye J: Multi-task feature learning via efficient l2, 1-norm minimization. Proc. Proceedings of the Twenty-Fifth Conference on Uncertainty in Artificial Intelligence: Montreal, Quebec, Canada2009

9. Deng C, Zhang C, He X: Unsupervised feature selection for Multi-Cluster data. Proc. Acm Sigkdd International Conference on Knowledge Discovery & Data Mining2010

10. Z. L, J. T: Unsupervised Feature Selection via Nonnegative Spectral Analysis and Redundancy Control. IEEE T IMAGE PROCESS 24:5343-5355, 2015

11. Nie F, Huang H, Xiao C, Ding CHQ: Efficient and Robust Feature Selection via Joint ℓ2, 1-Norms Minimization. Proc. International Conference on Neural Information Processing Systems2010

12. Yang Y, Shen HT, Ma Z, Huang Z, Zhou X: L21-norm regularized discriminative feature selection for unsupervised learning. Proc. International Joint Conference on Artificial Intelligence2011

13. Pedregosa F, et al.: Scikit-learn: Machine Learning in Python. J MACH LEARN RES 12:2825-2830, 2011
